# Supplementary material for: Efficient and accurate whole genome assembly and methylome profiling of E. coli
Source: PubMed Central journal article supplement (PMC4046830; doi:10.1186/1471-2164-14-675), 2013-10-03
Supplement: 12864_2013_5438_MOESM1_ESM.pdf [file 12864_2013_5438_MOESM1_ESM.pdf]

Table S1 – BL21(DE3) sequencing statistics

| <b>Machine</b> | <b>Type of Sequencing</b>     | <b>Avg Read Length</b> | <b>Avg Quality</b> | <b>Total Bases</b> |
|----------------|-------------------------------|------------------------|--------------------|--------------------|
| Ion Torrent    | Single-end, 318 chip          | 199                    | 28.84              | 4.93E+08           |
| Illumina MiSeq | Paired-end 150bp, Nextera Kit | 131                    | 34.56              | 4.97E+08           |
| PacBio RS      | Long-insert, 1x120 movies     | 1909                   | 9.73               | 8.39E+08           |
