# Supplementary material for: Efficient and accurate whole genome assembly and methylome profiling of E. coli
Source: PubMed Central journal article supplement (PMC4046830; doi:10.1186/1471-2164-14-675), 2013-10-03
Supplement: 12864_2013_5438_MOESM3_ESM.pdf [file 12864_2013_5438_MOESM3_ESM.pdf]

Table S2 – Post-error correction statistics

| Correction Method | Approx. PacBio coverage | Avg. length pre-correction | Avg. Qscore pre-correction | Approx. coverage post-correction | Yield | Avg. length post-correction | Avg. Qscore post-correction | 20-25X coverage | 20-25X avg. length | 20-25X avg Qscore | 10-15X coverage | 10-15X avg. length | 10-15X avg. Qscore |
|-------------------|-------------------------|----------------------------|----------------------------|----------------------------------|-------|-----------------------------|-----------------------------|-----------------|--------------------|-------------------|-----------------|--------------------|--------------------|
| Ion               | 112                     | 1998.79                    | 9.69                       | 81.04                            | 0.72  | 1556.35                     | 55.85                       | 22.62           | 4655.82            | 56.25             | 15.03           | 5661.46            | 56.34              |
|                   | 186                     | 1909.00                    | 9.73                       | 136.30                           | 0.73  | 1564.18                     | 55.98                       | 22.65           | 5515.19            | 56.44             | 13.84           | 6510.52            | 56.50              |
| MiSeq             | 112                     | 1998.78                    | 9.69                       | 72.8                             | 0.65  | 1403.43                     | 57.39                       | 20.9            | 3925.38            | 57.49             | 14.5            | 4725.64            | 57.53              |
|                   | 186                     | 1908.99                    | 9.73                       | 124.5                            | 0.67  | 1429.89                     | 57.47                       | 23.8            | 4627.20            | 57.62             | 14              | 5620.57            | 57.64              |
| Preassembler      | 112                     | 1998.79                    | 9.69                       |                                  |       |                             |                             | 22.72           | 5094.44            | 46.29             | 15.41           | 5500.94            | 57.75              |
|                   | 186                     | 1909.00                    | 9.73                       |                                  |       |                             |                             | 23.04           | 5512.50            | 57.93             | 16.28           | 6335.60            | 58.18              |
