# Supplementary material for: Efficient and accurate whole genome assembly and methylome profiling of E. coli
Source: BMC Genomics. 2013 Oct 3;14(1):675. doi: 10.1186/1471-2164-14-675 (PMC4046830; doi:10.1186/1471-2164-14-675)
Supplement: Supplementary file 4 — Additional file 4: Table S3: Celera spec file parameters. (PDF 36 KB) [file 12864_2013_5438_MOESM4_ESM.pdf]

### Table S3 – Celera spec file parameters

[illegible]
